# Supplementary material for: Combinatorial observation ionospheric characteristics during tropical cyclone Debbie passing eastern Australia in 2017 using GPS and ion sounder
Source: Copernicus journal article supplement (doi:10.5194/angeo-2019-72), 2019-06-12
Supplement: Supplementary file [file angeo-2019-72-AC3-supplement.zip]

This document certifies that the manuscript

**Combined GPS and ionosonde observations of ionospheric characteristics as tropical cyclone Debbie passed over eastern Australia in 2017**

prepared by the authors

**Fuyang Ke, Jinling Wang, Kehe Wang, Jiuqing Xu, Yong Wang, Xinzhi Wang, Jian Deng**

was edited for proper English language, grammar, punctuation, spelling, and overall style by one or more of the highly qualified native English speaking editors at AJE.

This certificate was issued on **December 5, 2019** and may be verified on the [AJE website](https://aje.com) using the verification code **F942-3D7D-111E-2824-0CCP**.

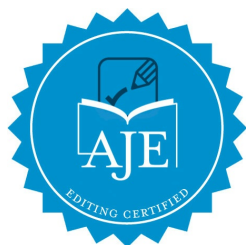

Neither the research content nor the authors' intentions were altered in any way during the editing process. Documents receiving this certification should be English-ready for publication; however, the author has the ability to accept or reject our suggestions and changes. To verify the final AJE edited version, please visit our verification page at [aje.com/certificate](https://aje.com/certificate). If you have any questions or concerns about this edited document, please contact AJE at [support@aje.com](mailto:support@aje.com).
